# Supplementary material for: Large emissions from floodplain trees close the Amazon methane budget
Source: Springer Nature journal article supplement (doi:10.1038/nature24639), 2017-12-01
Supplement: 41586_2017_BFnature24639_MOESM1_ESM.pdf [file 41586_2017_BFnature24639_MOESM1_ESM.pdf]

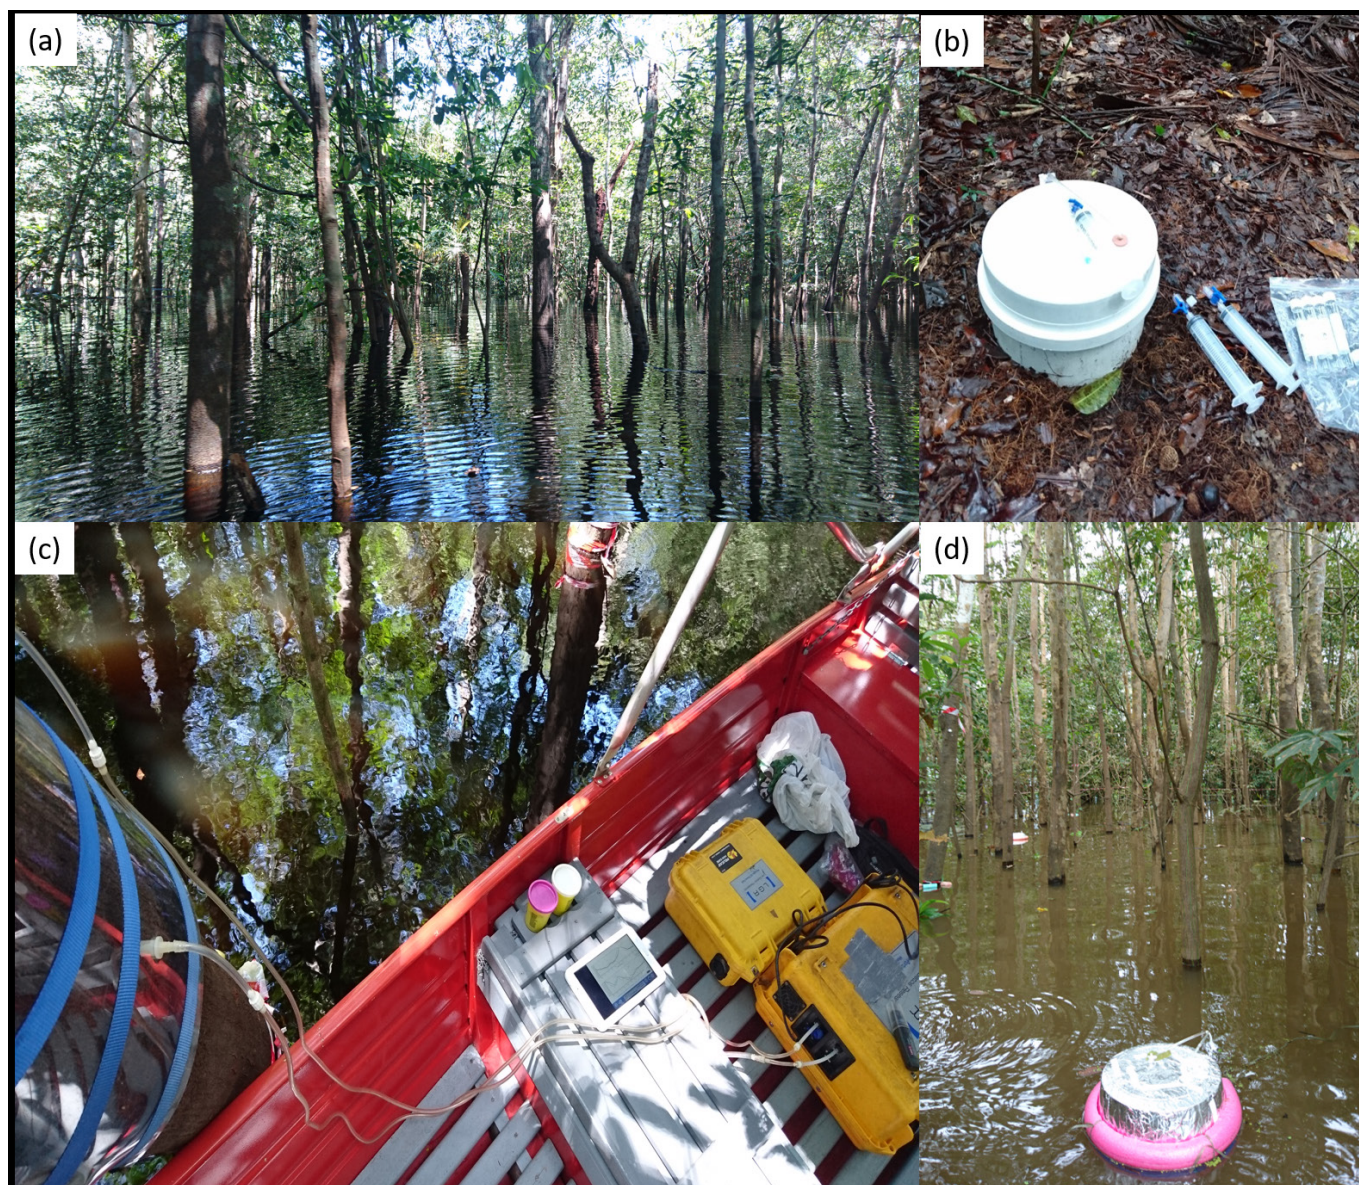

**Supplementary Figure 1** Photographs depicting one of the study sites, a typically inundated flooded forest (a), soil flux (b), mature tree stem flux (c) and aquatic flux (d) measurements.

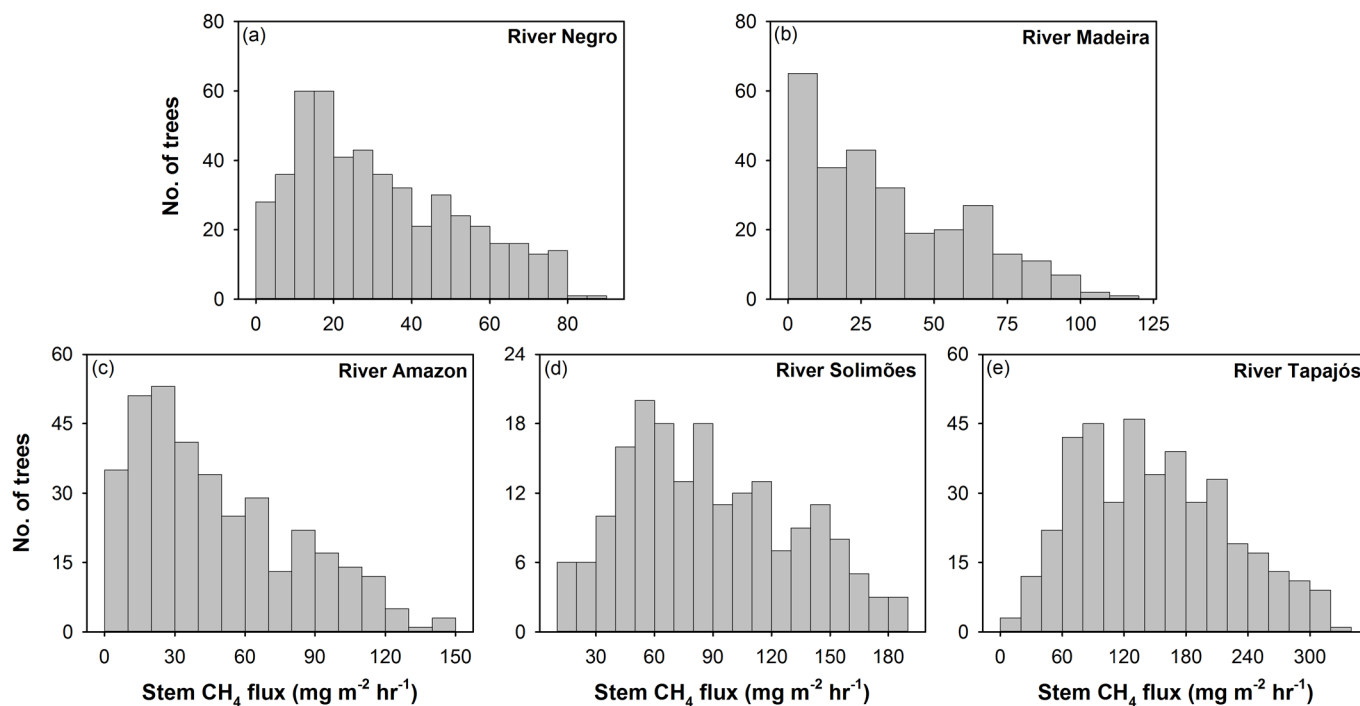

**Supplementary Figure 2** Frequency distribution of stem  $\text{CH}_4$  fluxes from 20-50 cm of stem height from mature trees measured from river a) Negro, b) Madeira, c) Amazon, d) Solimões and e) Tapajós.

**Table 1 Additional information for all sampling sites (50 × 80 m) in this study.**

| Id  | Location (Latitude/longitude)                                                                                          | River    | Water type  | Water season | Water table depth range (m) | No. of mature trees | No. of young trees |
|-----|------------------------------------------------------------------------------------------------------------------------|----------|-------------|--------------|-----------------------------|---------------------|--------------------|
| S1  | 3°19' 40.8"S; 60°42' 39.2"W<br>3°19' 42.3"S; 60°42' 43.3"W                                                             | Solimões | White water | High         | -0.95 to 9.5                | 445                 | 275                |
| S2  | 3°24' 37.1"S; 60°14' 45.6"W<br>3°24' 42.8"S; 60°14' 31.4"W                                                             | Solimões | White water | High         | -1 to 8.5                   | 436                 | 244                |
| N3  | 2°49' 25.9"S; 60°28' 22.4"W                                                                                            | Negro    | Black water | High         | -1 to 9.5                   | 436                 | 198                |
| N4  | 2°37' 41.6"S; 60°48' 41.6"W                                                                                            | Negro    | Black water | High         | -1 to 9.2                   | 424                 | 240                |
| N5  | 2°30' 37.9"S; 60°46' 16.8"W                                                                                            | Negro    | Black water | High         | -0.94 to 8.2                | 439                 | 231                |
| N6  | 2°48' 58.5"S; 60°45' 53"W                                                                                              | Negro    | Black water | High         | -1 to 8.2                   | 425                 | 234                |
| A7  | 2°20' 18.9"S; 57°35' 7.8"W                                                                                             | Amazon   | White water | High         | -1 to 7.5                   | 390                 | 199                |
| A8  | 2°12' 21.4"S; 55°6' 14.6"W                                                                                             | Amazon   | White water | High         | -1 to 7                     | 370                 | 54                 |
| A9  | 2°31' 26.4"S; 54°32' 3.6"W<br>2°31' 58.8"S; 54°32' 47.3"W                                                              | Amazon   | White water | High         | -0.99 to 7.1                | 292                 | 67                 |
| T10 | 2°28' 53.9"S; 54°58' 22.7"W<br>2°28' 40.5"S; 54°58' 20.1"W<br>2°28' 56.3"S; 54°58' 21"W<br>2°28' 29.6"S; 54°58' 12.2"W | Tapajós  | Clear water | High         | -1 to 6.5                   | 361                 | 173                |
| T11 | 2°57' 47.4"S; 55°5' 10.8"W                                                                                             | Tapajós  | Clear water | High         | -1 to 5.4                   | 370                 | 197                |
| T12 | 2°15' 51.7"S; 54°50' 2.3"W<br>2°15' 47.4"S; 54°50' 10.8"W                                                              | Tapajós  | Clear water | High         | -1 to 8.1                   | 322                 | 49                 |
| M13 | 8°1' 1"S; 63°5' 1"W                                                                                                    | Madeira  | White water | Falling      | -1 to 0                     | 520                 | 246                |



**Table 2** Tree species identified within our 13 plots across the central Amazon basin.

| Family <sup>a</sup> | Genus               | Species                                           |
|---------------------|---------------------|---------------------------------------------------|
| Anacardiaceae       | <i>Spondias</i>     | <i>mombin</i> L.                                  |
| Boraginaceae        | <i>Cordia</i>       | <i>nodosa</i> Lam.                                |
| Burseraceae         | <i>Protium</i>      | <i>heptaphyllum</i> (Aubl.) March.                |
| Celastraceae        | <i>Maytenus</i>     | <i>guianensis</i> Klotzsch                        |
| Chrysobalanaceae    | <i>Licania</i>      | <i>heteromorpha</i> Benth.                        |
| Combretaceae        | <i>Buchenavia</i>   | <i>grandis</i> Ducke                              |
| Combretaceae        | <i>Terminalia</i>   | <i>amazonica</i> (J.F.Gmel.) Exell                |
| Euphorbiaceae       | <i>Hevea</i>        | <i>brasiliensis</i> (Willd. ex A.Juss.) Müll.Arg. |
| Fabaceae            | <i>Albizia</i>      | <i>inundata</i> (Mart.) Barneby & J.W. Grimes     |
| Fabaceae            | <i>Albizia</i>      | <i>Lebbeck</i> (L.) Benth.                        |
| Fabaceae            | <i>Bowdichia</i>    | <i>virgilioides</i> Kunth                         |
| Fabaceae            | <i>Cassia</i>       | <i>leiandra</i> Benth.                            |
| Fabaceae            | <i>Dinizia</i>      | <i>excelsa</i> Ducke                              |
| Fabaceae            | <i>Macrolobium</i>  | <i>acacifolium</i> (Benth) Benth.                 |
| Fabaceae            | <i>Parkia</i>       | <i>multijuga</i> Benth.                           |
| Fabaceae            | <i>Peltogyne</i>    | <i>venosa</i> (Valh) Benth.                       |
| Fabaceae            | <i>Sclerolobium</i> | <i>paniculatum</i> Vogel                          |
| Goupiaceae          | <i>Goupia</i>       | <i>glabra</i> Aubl.                               |
| Lecythidaceae       | <i>Cariniana</i>    | <i>micrantha</i> Ducke                            |
| Lecythidaceae       | <i>Eschweilera</i>  | <i>coriacea</i> (DC.) S.A.Mori                    |
| Malvaceae           | <i>Pseudobombax</i> | <i>munguba</i> (Mart.) Dugand                     |
| Monimiaceae         | <i>Hennecartia</i>  | <i>omphalandra</i> J. Poiss.                      |
| Moraceae            | <i>Brosimum</i>     | <i>acutifolium</i>                                |
| Moraceae            | <i>Brosimum</i>     | <i>rubescens</i> Taub.                            |
| Moraceae            | <i>Clarisia</i>     | <i>racemosa</i> Ruiz & Pav.                       |
| Myristicaceae       | <i>Osteophloeum</i> | <i>platyspermum</i> (Spruce ex A.DC.) Warb.       |
| Rubiaceae           | <i>Genipa</i>       | <i>americana</i> L.                               |
| Salicaceae          | <i>Casearia</i>     | <i>arborea</i> (Rich.) Urb.                       |
| Salicaceae          | <i>Laetia</i>       | <i>corymbulosa</i> Spruce ex Benth.               |
| Sapotaceae          | <i>Pouteria</i>     | <i>caimito</i> (Ruiz & Pav.) Radlk.               |
| Simaroubaceae       | <i>Simarouba</i>    | <i>amara</i> Aubl.                                |
| Urticaceae          | <i>Cecropia</i>     | <i>latiloba</i> Miq.                              |
| Violaceae           | <i>Amphirrhox</i>   | <i>longifolia</i> (A.St.-Hil.) Spreng.            |
| Annonaceae          | <i>Guatteria</i>    | <i>sp.</i>                                        |
| Apocynaceae         | <i>Lacmellea</i>    | <i>sp.</i>                                        |
| Bignoniaceae        | <i>Handroanthus</i> | <i>sp.</i>                                        |
| Boraginaceae        | <i>Cordia</i>       | <i>sp.</i>                                        |
| Burseraceae         | <i>Protium</i>      | <i>sp.</i>                                        |
| Clusiaceae          | <i>Caraipa</i>      | <i>sp.</i>                                        |
| Clusiaceae          | <i>Clusia</i>       | <i>sp.</i>                                        |
| Clusiaceae          | <i>Garcinia</i>     | <i>sp.</i>                                        |
| Erythroxylaceae     | <i>Erythroxylum</i> | <i>sp.</i>                                        |
| Euphorbiaceae       | <i>Alchornea</i>    | <i>sp.</i>                                        |
| Euphorbiaceae       | <i>Croton</i>       | <i>sp.</i>                                        |
| Euphorbiaceae       | <i>Hevea</i>        | <i>sp.</i>                                        |

|                 |                      |            |
|-----------------|----------------------|------------|
| Euphorbiaceae   | <i>Sapium</i>        | <i>sp.</i> |
| Euphorbiaceae   | <i>Tetrorchidium</i> | <i>sp.</i> |
| Fabaceae        | <i>Hymenaea</i>      | <i>sp.</i> |
| Fabaceae        | <i>Inga</i>          | <i>sp.</i> |
| Fabaceae        | <i>Macarobium</i>    | <i>sp.</i> |
| Fabaceae        | <i>Parkia</i>        | <i>sp.</i> |
| Fabaceae        | <i>Peltogyne</i>     | <i>sp.</i> |
| Fabaceae        | <i>Swartzia</i>      | <i>sp.</i> |
| Lauraceae       | <i>Ocotea</i>        | <i>sp.</i> |
| Lecythidaceae   | <i>Eschweilera</i>   | <i>sp.</i> |
| Lecythidaceae   | <i>Lechytis</i>      | <i>sp.</i> |
| Malpighiaceae   | <i>Acmanthera</i>    | <i>sp.</i> |
| Malvaceae       | <i>Luehea</i>        | <i>sp.</i> |
| Malvaceae       | <i>Mollia</i>        | <i>sp.</i> |
| Meliaceae       | <i>Cedrela</i>       | <i>sp.</i> |
| Nyctaginaceae   | <i>Guapira</i>       | <i>sp.</i> |
| Olacaceae       | <i>Heisteria</i>     | <i>sp.</i> |
| Rubiaceae       | <i>Cuviera</i>       | <i>sp.</i> |
| Rutaceae        | <i>Zanthoxylum</i>   | <i>sp.</i> |
| Salicaceae      | <i>Casearia</i>      | <i>sp.</i> |
| Sapindaceae     | <i>Cupania</i>       | <i>sp.</i> |
| Sapotaceae      | <i>Micropholis</i>   | <i>sp.</i> |
| Sapotaceae      | <i>Pouteria</i>      | <i>sp.</i> |
| Urticaceae      | <i>Cecropia</i>      | <i>sp.</i> |
| Violaceae       | <i>Amphirrhox</i>    | <i>sp.</i> |
| Vochysiaceae    | <i>Qualea</i>        | <i>sp.</i> |
| Annonaceae      | -                    | -          |
| Arecaceae       | -                    | -          |
| Bignoniaceae    | -                    | -          |
| Burseraceae     | -                    | -          |
| Erythroxylaceae | -                    | -          |
| Euphorbiaceae   | -                    | -          |
| Fabaceae        | -                    | -          |
| Lecythidaceae   | -                    | -          |
| Meliaceae       | -                    | -          |
| Moraceae        | -                    | -          |
| Myrsinaceae     | -                    | -          |
| Ochnaceae       | -                    | -          |
| Quiinaceae      | -                    | -          |
| Rubiaceae       | -                    | -          |
| Rutaceae        | -                    | -          |
| Sapotaceae      | -                    | -          |

<sup>a</sup> Out of the 2357 trees investigated, only 40% of the tree species could be identified, with some trees only up to genus level.

**Table 3 Surface area (m<sup>2</sup>) used to estimate ecosystem contributions from all CH<sub>4</sub> emitting pathways in each sampling plot.**

| Id  | River                | Water season | M_tree stem surface area <sup>a</sup> | M_tree stem surface area <sup>b</sup> | Y_tree stem surface area <sup>c</sup> | Y_tree stem surface area <sup>d</sup> | Y_tree Leaf area | Tree basal area (M + Y) | Soil surface area | Aquatic surface area | Macrophyte surface area |
|-----|----------------------|--------------|---------------------------------------|---------------------------------------|---------------------------------------|---------------------------------------|------------------|-------------------------|-------------------|----------------------|-------------------------|
| S1  | Solimões             | High         | 532                                   | 774                                   | 36.1                                  | 39.1                                  | 3768             | 48                      | 409               | 3071                 | 472                     |
| S2  | Solimões             | High         | 364                                   | 502                                   | 32.7                                  | 33.2                                  | 4050             | 21.7                    | 426               | 3352                 | 200                     |
| N3  | Negro                | High         | 310                                   | 434                                   | 26.8                                  | 27.9                                  | 3010             | 17.2                    | 993               | 2990                 | 0                       |
| N4  | Negro                | High         | 372                                   | 542                                   | 31.5                                  | 32.8                                  | 3480             | 29.2                    | 1009              | 2962                 | 0                       |
| N5  | Negro                | High         | 426                                   | 613                                   | 31.1                                  | 33.4                                  | 3627             | 32.2                    | 1064              | 2904                 | 0                       |
| N6  | Negro                | High         | 330                                   | 477                                   | 29.1                                  | 30.3                                  | 3487             | 17.2                    | 1608              | 2375                 | 0                       |
| A7  | Amazon               | High         | 405                                   | 589                                   | 25.9                                  | 27.0                                  | 3085             | 32.2                    | 1138              | 2712                 | 118                     |
| A8  | Amazon <sup>e</sup>  | High         | 318                                   | 457                                   | 7.7                                   | 7.5                                   | 3851             | 16.6                    | 0                 | 3593                 | 390                     |
| A9  | Amazon <sup>e</sup>  | High         | 271                                   | 361                                   | 9.5                                   | 9.6                                   | 3598             | 17.1                    | 0                 | 3190                 | 793                     |
| T10 | Tapajós              | High         | 498                                   | 716                                   | 21.8                                  | 23.2                                  | 2906             | 49.2                    | 1293              | 2454                 | 204                     |
| T11 | Tapajós              | High         | 462                                   | 666                                   | 26.2                                  | 28                                    | 3073             | 42.4                    | 1149              | 2180                 | 629                     |
| T12 | Tapajós <sup>e</sup> | High         | 367                                   | 547                                   | 6.9                                   | 7.4                                   | 3119             | 26.2                    | 0                 | 3571                 | 403                     |
| M13 | Madeira              | Falling      | 503                                   | 669                                   | 34.4                                  | 35.1                                  | 4059             | 46.4                    | 3043              | 950                  | 0                       |

<sup>a</sup> Surface area of mature trees between 0 and 140 cm above the soil surface; <sup>b</sup> Surface area of mature trees 0–5 m (maximum) above the soil surface estimated using the relationship established between stem CH<sub>4</sub> flux and stem height intervals between 0 and 140 cm; <sup>c</sup> Surface area of young trees between 0 and 135 cm above the soil surface; <sup>d</sup> Surface area of young trees up to 1.85 m of stem height estimated using the relationship between stem CH<sub>4</sub> flux and stem height intervals; <sup>e</sup> The study sites were fully flooded with no raised hummocks or exposed soil.

**Table 4 Coefficient of variation (%) for surface areas used in the ecosystem contribution estimations.**

| River                    | M_tree stem surface area <sup>a</sup> | M_tree stem surface area <sup>b</sup> | Y_tree stem surface area <sup>c</sup> | Y_tree stem surface area <sup>d</sup> | Tree basal area | Aquatic surface area | Soil surface area | Macrophyte surface area |
|--------------------------|---------------------------------------|---------------------------------------|---------------------------------------|---------------------------------------|-----------------|----------------------|-------------------|-------------------------|
| Negro ( <i>n</i> = 4)    | 44.7                                  | 49.8                                  | 22.8                                  | 24.7                                  | 55.2            | 10.3                 | 25.2              | -                       |
| Madeira ( <i>n</i> = 3)  | 35                                    | 38.6                                  | 20.5                                  | 20.4                                  | 38.3            | 42.8                 | 38.4              | -                       |
| Amazon ( <i>n</i> = 3)   | 40.5                                  | 45                                    | 24.7                                  | 25.7                                  | 55.9            | 13.9                 | 173               | 78.3                    |
| Solimões ( <i>n</i> = 2) | 47.9                                  | 52.6                                  | 25.7                                  | 25.8                                  | 58.8            | 9.2                  | 5.2               | 39.5                    |
| Tapajós ( <i>n</i> = 3)  | 44.9                                  | 48.3                                  | 27.2                                  | 28                                    | 55.1            | 27                   | 87.1              | 92.7                    |

<sup>a</sup> Surface area of mature trees between 0 and 140 cm above the soil surface; <sup>b</sup> Surface area of mature trees 0-5 m (maximum) above the soil surface estimated using the relationship established between stem CH<sub>4</sub> flux and stem height intervals between 0 and 140 cm; <sup>c</sup> Surface area of young trees between 0 and 135 cm above the soil surface; <sup>d</sup> Surface area of young trees up to 1.85 m of stem height estimated using the relationship between stem CH<sub>4</sub> flux and stem height intervals.

**Table 5 Estimated surface areas for the entire lowland Amazon basin (km<sup>2</sup>)<sup>a</sup>.**

| Months    | Flooded Forest | Aquatic surfaces | Macrophytes | Soil surfaces | Open water |
|-----------|----------------|------------------|-------------|---------------|------------|
| January   | 177,080        | 169,951          | 77,491      | 286,621       | 65,484     |
| February  | 221,231        | 214,102          | 88,469      | 242,470       | 50,444     |
| March     | 280,666        | 273,537          | 97,778      | 183,035       | 56,408     |
| April     | 361,137        | 354,009          | 110,610     | 102,563       | 66,233     |
| May       | 441,200        | 434,072          | 120,200     | 22,501        | 73,200     |
| June      | 463,701        | 456,572          | 107,604     | 0             | 70,452     |
| July      | 368,669        | 361,541          | 110,352     | 95,031        | 76,307     |
| August    | 273,229        | 266,101          | 103,583     | 190,472       | 73,313     |
| September | 311,571        | 304,442          | 74,362      | 152,130       | 78,360     |
| October   | 176,100        | 168,972          | 56,982      | 287,601       | 56,300     |
| November  | 198,781        | 191,652          | 52,800      | 264,920       | 45,528     |
| December  | 136,342        | 129,214          | 66,958      | 327,359       | 54,978     |

<sup>a</sup> Surface areas estimated for the entire lowland Amazon basin using Melack *et al.*<sup>34</sup> and Hess *et al.*<sup>22</sup> as described under methods section.
